# Supplementary material
Source: publisher figshare collection journal article supplement (https://asha.figshare.com/ndownloader/files/15667031)
Supplement: Supplementary file 1 [file 15667031]

|                                        |                                     | <i>n</i> | %  |
|----------------------------------------|-------------------------------------|----------|----|
| Cause of injury                        | Motor vehicle accident <sup>a</sup> | 12       | 38 |
|                                        | Fall                                | 7        | 22 |
|                                        | Assault                             | 3        | 9  |
|                                        | Sports and recreation <sup>b</sup>  | 3        | 9  |
|                                        | Other                               | 7        | 22 |
| Type of injury                         | Direct impact/blow to head          | 12       | 38 |
|                                        | Direct impact/head against object   | 12       | 38 |
|                                        | Acceleration/deceleration           | 6        | 19 |
|                                        | Fall ground level                   | 3        | 9  |
|                                        | Fall >1 m (3 ft)                    | 3        | 9  |
|                                        | Other                               | 5        | 16 |
| Part of head affected                  | No direct blow to head              | 3        | 9  |
|                                        | Forehead                            | 6        | 19 |
|                                        | Right side                          | 8        | 25 |
|                                        | Left side                           | 11       | 34 |
|                                        | Back of head                        | 12       | 38 |
|                                        | Top of head                         | 2        | 6  |
|                                        | Face                                | 2        | 6  |
| Back or neck injuries?                 | Back                                | 14       | 44 |
|                                        | Neck                                | 5        | 16 |
|                                        | Did not answer                      | 12       | 38 |
| Return to work                         | Returned to previous level          | 6        | 19 |
|                                        | Returned at reduced level           | 3        | 9  |
|                                        | Different work/school               | 0        | 0  |
|                                        | Sheltered environment               | 1        | 3  |
|                                        | Not returned to work                | 21       | 66 |
|                                        | Not applicable                      | 1        | 3  |
| Return to other activities             | Full return                         | 2        | 6  |
|                                        | Reduced level                       | 12       | 38 |
|                                        | Unable to return to most activities | 16       | 50 |
|                                        | Other                               | 2        | 6  |
| Injury-related litigation <sup>c</sup> | No                                  | 15       | 47 |
|                                        | Yes                                 | 16       | 50 |
|                                        | Worker's compensation               | 9        | 28 |
|                                        | Disability evaluation               | 1        | 3  |
|                                        | Personal injury                     | 10       | 31 |
|                                        | Other                               | 1        | 3  |

<sup>a</sup>Includes motor vehicle and motorcycle accidents and pedestrians hit by vehicles.

<sup>b</sup>Includes traditional sports, equestrian, recreational activities battery.

<sup>c</sup>Individuals may have been involved in more than one type of litigation.
